# 1 Automatic identification and annotation of MYB gene family members in plants

2 Boas Pucker

3 Institute of Plant Biology & Braunschweig Integrated Centre of Systems Biology (BRICS), TU  
4 Braunschweig, Braunschweig, Germany

5 [b.pucker@tu-braunschweig.de](mailto:b.pucker@tu-braunschweig.de)

6

## 7 Abstract

8 **Background:** MYBs are among the largest transcription factor families in plants. Consequently, members  
9 of this family are involved in a plethora of processes including development and specialized metabolism.  
10 The MYB families of many plant species were investigated in the last two decades since the first  
11 investigation looked at *Arabidopsis thaliana*. This body of knowledge and characterized sequences  
12 provide the basis for the identification, classification, and functional annotation of candidate sequences  
13 in new genome and transcriptome assemblies.

14 **Results:** A pipeline for the automatic identification and functional annotation of MYBs in a given  
15 sequence data set was implemented in Python. MYB candidates are identified, screened for the  
16 presence of a MYB domain and other motifs, and finally placed in a phylogenetic context with well  
17 characterized sequences. In addition to technical benchmarking based on existing annotation, the  
18 transcriptome assembly of *Croton tiglium* and the annotated genome sequence of *Castanea crenata*  
19 were screened for MYBs. Results of both analyses are presented in this study to illustrate the potential  
20 of this application. The analysis of one species takes only a few minutes depending on the number of  
21 predicted sequences and the size of the MYB gene family. This pipeline, the required bait sequences,  
22 and reference sequences for a classification are freely available on github:  
23 [https://github.com/bpucker/MYB\\_annotator](https://github.com/bpucker/MYB_annotator).

24 **Conclusions:** This automatic annotation of the MYB gene family in novel assemblies makes genome-  
25 wide investigations consistent and paves the way for comparative studies in the future. Candidate genes  
26 for in-depth analyses are presented based on their orthology to previously characterized sequences  
27 which allows the functional annotation of the newly identified MYBs with high confidence. The  
28 identification of orthologs can also be harnessed to detect duplication and deletion events.

29

30

31 Keywords: MYBs, *Croton tiglium*, *Castanea crenata*, genome-wide, R2R3 MYBs, orthology, phylogeny

32

## 33 Introduction

34 MYB transcription factors are named after an Avian myeloblastosis virus protein (v-Myb) which is a  
35 modified version of the cellular c-Myb and causes the activation of oncogenes [1]. While MYBs were first  
36 discovered in animals, they appear in substantially larger numbers in plants and form one of the largest  
37 transcription factor families [2–6]. A characteristic MYB feature is the presence of a conserved DNA-  
38 binding domain at the N-terminus [7]. Up to four imperfect amino acid repeats (50-53 amino acids) form  
39 three alpha-helices each [7]. Helix two and three of each repeat are arranged to a helix-turn-helix  
40 structure [8]. Three regularly spaced tryptophan or other hydrophobic amino acid residues form the  
41 core of this structure [8]. The third alpha helix is responsible for the direct DNA interaction [9]. The  
42 repeats are classified into R1, R2, and R3 based on similarity to the respective repeats of the first  
43 characterized MYB, c-Myb [1]. MYB proteins are classified based on the presence of these repeats. For  
44 example, R2R3-MYBs harbor the R2 and R3 repeat while 3R-MYBs have one copy of each of the repeats  
45 (R1R2R3). Further classification into subgroups can be achieved based on the phylogenetic relationships  
46 and characteristic sequence motifs in the C-terminal region [2, 5, 10]. Different MYB classification  
47 systems were proposed in previous studies [2, 5, 10].

48 R1R2R3-MYBs have been proposed to be regulators of the cell cycle with conserved functions between  
49 animals and plants [11, 12]. R2R3-MYBs account for the large MYB family size in plants [2]. The  
50 evolutionary origin of R2R3-MYBs and 3R-MYBs is still debated. The loss model proposes that R2R3-  
51 MYBs diverged from 3R-MYBs through loss of the R1 repeat [13–15], while the gain model proposes that  
52 the 3R-MYBs evolved from the R2R3-MYB through duplication of a repeat [10, 16]. R2R3-MYBs are  
53 involved in the regulation of numerous processes including the regulation of developmental processes,  
54 response to environmental stresses, and specialized metabolism [17–19]. WEREWOLF/MYB66 is a  
55 negative regulator of the root hair formation that determines the pattern of root hairs on the root  
56 epidermis of *Arabidopsis thaliana* [17]. An investigation of this MYB based on its crystal structure  
57 revealed the DNA binding site AACNGC and also suggests that this MYB is able to differentiate between  
58 DNA methylation states [20]. DEFECTIVE IN TAPETAL DEVELOPMENT AND FUNCTION/MYB35 determines  
59 the sex of *Asparagus officinalis*, but not in all other species of this genus [21]. The *A. thaliana*  
60 PFG1/MYB12 and the paralogs PFG2/MYB11 and PFG3/MYB11 are responsible for the regulation of the  
61 flavonol biosynthesis in most tissues [18]. This process appears highly conserved as orthologs of the  
62 AtMYB11/AtMYB12/AtMYB111 clade in *Beta vulgaris* [22] and *Medicago truncatula* [19] are also  
63 regulators of the flavonol biosynthesis. MYB21 and MYB24 were identified as additional flavonol  
64 regulators in the stamen of *A. thaliana* [23]. Some processes like the regulation of the flavonol  
65 biosynthesis depend only on MYB regulators [18]. Other specialized metabolite biosynthesis pathways  
66 are regulated by the interaction of multiple proteins. The MBW complex, named after the three  
67 components MYB, bHLH, and WD40, is one of the best studied transcriptional regulation systems [24–  
68 27]. Two branches of the flavonoid biosynthesis, the anthocyanin and proanthocyanidin biosynthesis,  
69 are controlled by the MBW complex [24, 25, 28]. Since anthocyanins are responsible for the  
70 pigmentation of flowers and other plant structures, mutants in their regulation can be identified based  
71 on a visible phenotype. Proanthocyanidins are responsible for the coloration of seed coats thus mutants  
72 in their biosynthesis can be identified based on a yellow seed color. Mutations in the regulating MYBs

73 and other transcription factors [29–32] are often the reason for loss of anthocyanins and/or  
74 proanthocyanins. Transcriptional regulation was studied based on these pathways due to their visually  
75 detectable phenotypes.

76 Since MYBs are controlling many processes in plants, there is also a substantial interest to understand  
77 their functions in crop species. In Brassicaceae, the glucosinolate content controlled by several MYBs is  
78 an economically relevant trait [33]. ATR1/MYB34, HIG1/MYB51, and MYB122 increase the indolic  
79 glucosinolates and HAG1/MYB28, PMG2/RAO7/MYB29, and MYB76 the aliphatic glucosinolates in  
80 *Arabidopsis thaliana* [34–36]. The red coloration of sugar beets is controlled by BvMYB1 which activates  
81 two betalain biosynthesis genes [37]. *AmMYB1* in amaranth was identified as best candidate gene to  
82 explain the seed coloration variation between accessions [38]. A MYB appears to be the underlying  
83 factor of post-harvest hardening that renders a specific yam accession inedible within a day [39, 40].  
84 MYB duplications between different apple cultivars appear responsible for differences in the red fruit  
85 flesh coloration [41]. Consumers prefer apricots with a red blush which is controlled by an anthocyanin  
86 biosynthesis activating MYB [42]. The identification of MYB candidate genes and the regulated processes  
87 is the first step towards modification through SMART breeding or genome editing [43, 44]. This interest  
88 in MYBs sparked numerous genome-wide investigations in species with a new genome or transcriptome  
89 assembly [3, 4, 22, 31, 45–48]. The identification of MYBs is repeatedly performed on many different  
90 data sets with strong variation in the quality of the analyses. Well described *A. thaliana* MYB sequences  
91 [2] are often used as baits to find new MYBs based on sequence similarity. Like all routine tasks with  
92 clearly defined steps, the identification of MYBs is a promising target for an automatic approach. We  
93 previously developed an automatic workflow, called KIPes, for the annotation of core flavonoid  
94 biosynthesis genes which could also be expanded to the annotation of transcription factor gene families  
95 [4]. However, KIPes is optimized for the identification and assessment of enzymes based on conserved  
96 amino acids in the active center. One underlying assumption is a small number of gene copies per  
97 species, which is violated by the very large MYB gene family. Also it is technically possible to run KIPes  
98 for the identification of a gene family, the performance decreases with gene family size. Many previous  
99 studies relied only on BLAST or added additional filters for the presence of conserved R2R3-MYB  
100 domains in candidate sequences [4, 22, 49]. The inspection of MYB domains is laborious when  
101 performed manually, but suitable to define a set of fully functional R2R3-MYBs. While specificity of this  
102 filtering approach is high, it suffers from a low sensitivity i.e. neglects degenerated copies which might  
103 have experienced neofunctionalization. There are other solutions to identify orthologous sequences in a  
104 large number of species independent of the presence of specific sequence patterns [50, 51], but these  
105 approaches would require a substantial amount of manual cleaning to narrow down a final set of MYB  
106 sequences. Particular challenges are analyses based on transcriptome assemblies, because  
107 transcriptome assemblies show often a large number of isoforms resulting from alternative splicing or  
108 artifacts [52, 53].

109 This study presents a Python-based pipeline to provide a high quality annotation of all MYBs in a given  
110 set of peptide or coding sequences that are provided as input. Additionally, MYB candidates are checked  
111 for conserved domains and assigned to orthologs in other plant species. Genome sequencing and the  
112 construction of assemblies is becoming a routine task. The generation of high quality structural

113 annotations is also advancing quickly with the aid of massive RNA-Seq data sets and full length transcript  
114 sequencing. Therefore, a huge number of data sets will be available to study MYBs in an unprecedented  
115 number of different plant species. Our automatic identification of MYBs in a large number of species  
116 facilitates pan-MYB analyses to better understand the evolution of the MYBome and to transfer  
117 functional insights acquired in one species effectively to orthologs in other species.

118

## 119 **Implementation**

### 120 **MYB data sets**

121 The identification of MYBs in novel genome or transcriptome sequences requires broad phylogenetic  
122 coverage of bait sequences. The MYB domain sequences of *Arabidopsis thaliana* [2], *Vitis vinifera* [3],  
123 *Beta vulgaris* [22], *Musa acuminata* [4], *Vitis vinifera* [3], *Medicago truncatula*, *Populus trichocarpa*,  
124 *Citrus sinensis*, *Solanum lycopersicum*, *Solanum tuberosum*, *Aquilegia coerulea*, *Oryza sativa*, *Zea mays*  
125 [47], *Amborella trichopoda*, *Picea abies*, *Selaginella moellendorffii*, *Physcomitrella patens*,  
126 *Chlamydomonas reinhardtii*, *Volvox carteri*, *Micromonas pusilla*, *Ostreococcus lucimarinus*, and  
127 *Cyanidioschyzon merolae* [10] were merged to generate a bait sequence collection. Closely related non-  
128 MYB sequences including CDC5 were identified by running a BLASTp search with the bait MYB  
129 sequences against the Araport11 peptide sequences [54]. Hits with a minimum BLAST score of 100 were  
130 collected and stripped of any *bona fide* MYBs. This step allowed the identification of MYB-like  
131 sequences, but excludes spurious hits that would slow down the following analysis steps. While the  
132 previously described MYBs form a collection of 1889 ingroup sequences, these 26 non-MYB sequences  
133 represent the outgroup sequences for down-stream analysis.

### 134 **Pipeline**

135 The automatic annotation pipeline is summarized in **Fig. 1**. Required inputs are (1) the MYB bait  
136 sequences (described above), (2) a classification of the MYB bait sequences into ingroup and outgroup,  
137 and (3) a set of coding sequences or peptide sequences that will be analyzed. Step 0: All parameters,  
138 tool versions, and the input files are logged in a report file for reproducibility. If the Python module  
139 hashlib is available, md5sums are calculated for all input files to ensure an accurate documentation.  
140 However, calculation of this checksum is optional and file names (including their paths) will be  
141 documented in any case. Cleaning of the input sequences removes any characters from the sequence  
142 names that would interfere with the phylogenetic analysis. Step 1: Initial candidates are identified based  
143 on local sequence similarity via BLAST [55, 56] or HMMER [57]. Default parameters accept BLASTp hits  
144 with 50 amino acid length, 80% alignment similarity, and a maximum of 100 hits per bait sequence. This  
145 is a very sensitive setting given the large number of bait sequences and an expected MYB gene family  
146 size below 300 in most species. If a collection of coding sequences is provided, these will be translated  
147 and then compared based on BLASTp to harness the stronger conservation of amino acid sequences  
148 compared to nucleotide sequences. Step 3: A phylogenetic tree is constructed with these initial  
149 candidates and all bait sequences. Alignments are constructed with MAFFT [58]. Tree construction via

150 RAxML [59] and FastTree2 [60] is supported. FastTree2 (-wag -nopr -nosupport) is recommended due to  
151 substantially higher speed when large data sets are analyzed. Step 3: Calculation of distances between  
152 different leaves of the tree is used to identify ortholog relationships between bait and candidate  
153 sequences. The Python package dendropy [61] is applied using the patristic distance method and  
154 counting edges. To exclude outliers caused by fragmented sequences or annotation artifacts, candidates  
155 are excluded if the distance to the next bait sequences exceeds three times the average distance of  
156 nearest neighbours. This cutoff was optimized by manually inspecting distributions of this value in  
157 context with the corresponding phylogenetic trees, but it is possible to modify this value as well as most  
158 other parameters. The bait sequences with the shortest distance are identified for each selected  
159 candidate in the tree. If most of these bait sequences are ingroup MYBs, the candidate is classified as  
160 MYB (Additional file 1). If most of these bait sequences are outgroup MYBs, the candidate is classified as  
161 a MYB-like sequence (aka non-MYB). All sequences passing this filter are considered clean candidates.  
162 Step 4: A check for the presence of MYB repeats is performed based on regular expressions (see  
163 documentation for details) derived from previously reported alignments [10, 62]. A repeat-based MYB  
164 classification is widely used and also supported here. However, it is important to note that these groups  
165 do not represent monophyletic groups. Step 5: A new phylogenetic tree is constructed with the clean  
166 MYB candidates and all bait sequences. Step 6: An optional step assigns all newly discovered MYBs to a  
167 group of reference MYBs e.g. the well characterized *A. thaliana* MYBs. Based on the assumptions that  
168 orthologs are likely to have the same functions, this generates hypotheses about the function of the  
169 newly discovered MYBs. Additionally, it is possible to identify the expansion and contraction of specific  
170 MYB lineages compared to this reference. Step 7: It is possible to collapse large groups of very similar  
171 sequences in the analyzed data set and to represent these by only the longest sequence. This option is  
172 intended for transcriptome assemblies which can include large numbers of isoforms caused by  
173 alternative splicing and artifacts. Step 8: A new phylogentic tree of the representative sequences  
174 identified in step 7 and the reference sequence set (e.g. *A. thaliana* MYBs) is constructed.

175

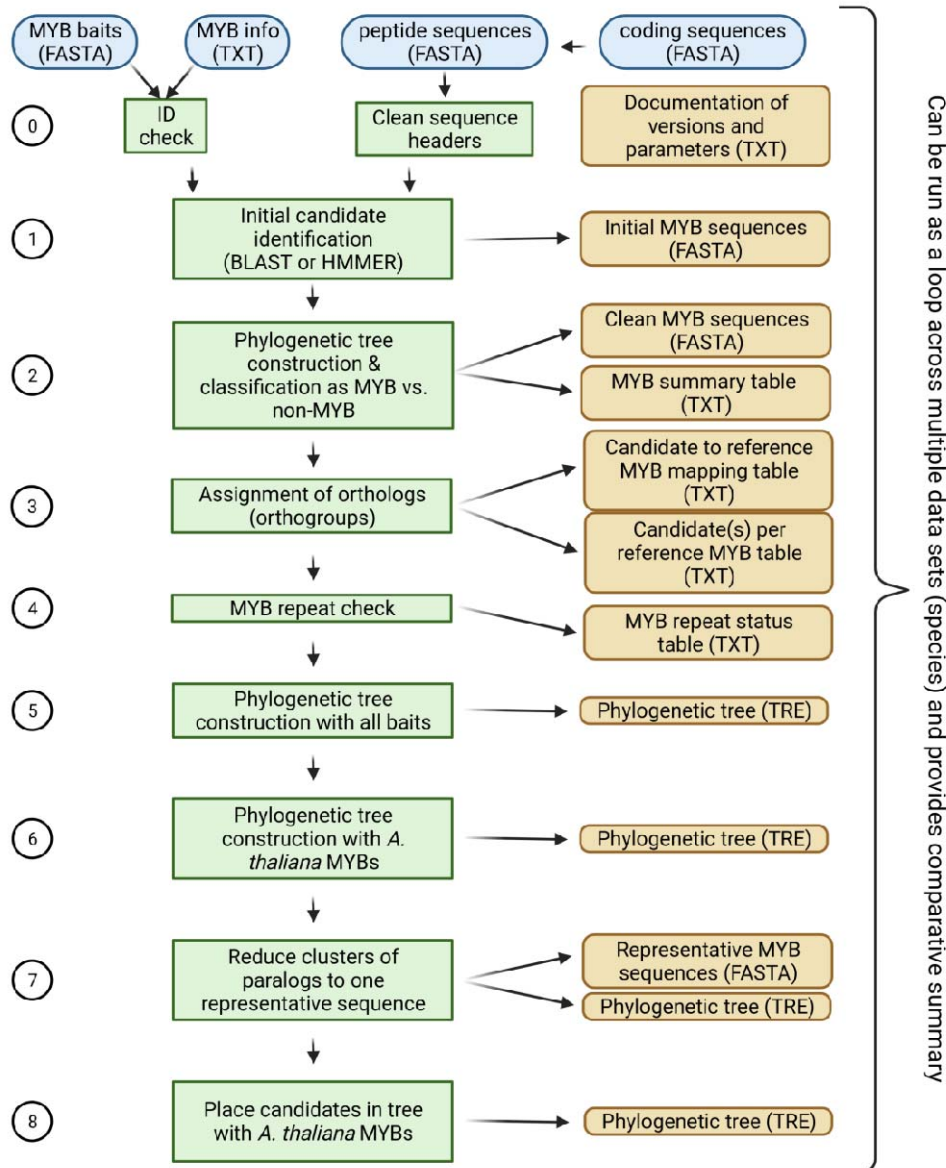

176

177 **Fig.1: Simplified illustration of a pipeline for the automatic annotation of MYBs.** Please refer to the  
 178 text and the documentation on github for additional details about the pipeline. There is an option to run  
 179 this pipeline across all provided input files in a folder. This enables the generation of summary files that  
 180 compare the MYB gene families between the analyzed species.

181

182

## 183 Results and Discussion

### 184 Proof of concept and benchmarking

185 Several benchmarking data sets were analyzed to ensure that the pipeline performs well for a range of  
186 different plant species. Araport11 sequences of the *A. thaliana* accession Col-0 [54] were analyzed and  
187 the well characterized MYBs were recovered (example output files on github). This demonstrates that  
188 the pipeline works as expected. The annotated sequences of the *A. thaliana* accession Nd-1 [63] were  
189 screened for MYBs. As expected, there is a 1:1 relationship between the MYBs of Col-0 and Nd-1  
190 (Additional file 2). This demonstrates that not just identical, but also slightly different sequences are  
191 accurately identified.

192

## 193 **Performance**

194 Benchmarking and performance tests were performed on a compute cluster without control over other  
195 jobs running on the same machine. This prevented a precise and informative calculation of run times,  
196 but also represents realistic conditions. A total of 121 coding sequence sets were downloaded from  
197 Phytozome [64] and screened for MYBs. The average run time per species using default parameters, 4  
198 CPUs, FastTree, and v0.153 of the pipeline was about 8 minutes (**Fig. 2**, Additional file 3). The memory  
199 requirements of all steps in the pipeline are very low (<1GB). The major factor contributing to the run  
200 time is the construction of a phylogenetic tree. However, the use of RAxML takes substantially longer. If  
201 a job is canceled, the analysis can continue at the last completed check point or at the last analyzed data  
202 set (species), respectively. The required hard disk space is minimal (63.5 MB for *A. thaliana*). Changes in  
203 the parameters and especially in the number of supplied bait sequences can alter the computational  
204 costs substantially. While there are differences with respect to the run time depending on the number  
205 of predicted species per family and the size of the MYB gene family, this analysis indicates that large  
206 data sets can be processed effectively.

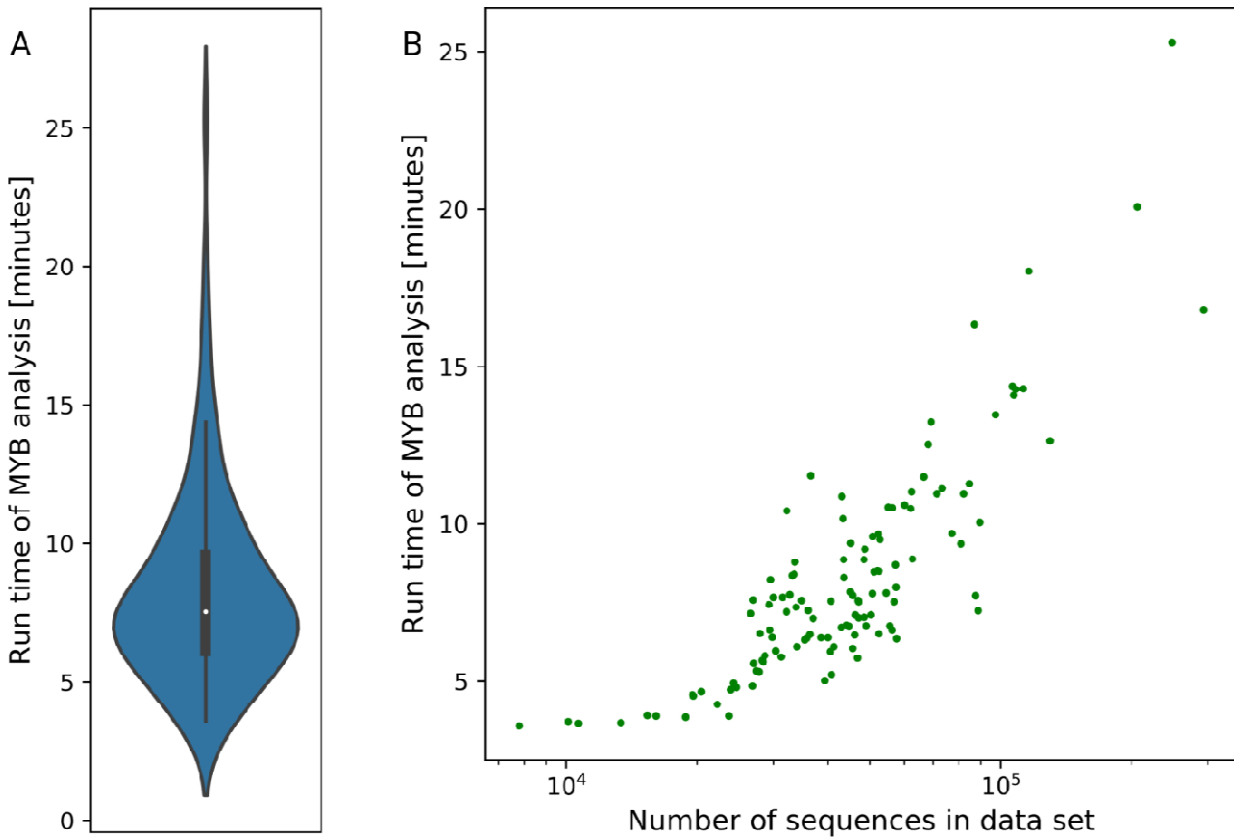

207

208 **Fig. 2:** Average run time per data set (species) with default parameters based on coding sequences (A).  
209 Positive correlation of run time with the number of sequences in the data set (B).

210

### 211 **Discovery of MYBs in the *Castanea crenata* genome sequence**

212 As a proof of concept, MYBs encoded in the recently sequenced *Castanea crenata* genome [65] were  
213 investigated. The predicted peptide sequences were screened with default parameters and resulted in  
214 the identification of 136 MYBs (**Fig. 3**, Additional file 4). A R2R3-MYB domain was detected in 112 of  
215 them. No orthologs of the *Cruciferae*-specific glucosinolate biosynthesis regulating MYBs AtMYB028,  
216 AtMYB029, AtMYB034, AtMYB051, AtMYB076, and AtMYB122 were detected in *C. crenata*. This is not  
217 surprising, because *C. crenata* belongs to the *Fagaceae*, and also in line with previous reports about the  
218 absence of this MYB lineage from non-Cruciferae [3]. Regulators of the flavonoid biosynthesis  
219 (AtMYB011/AtMYB012/AtMYB111, Ccr1.0Bg1101.1-S7/Ccr1.0Jg2696.1-S7), anthocyanin biosynthesis  
220 (AtMYB075/AtMYB090/AtMYB113/AtMYB114, Ccr1.0Ag5288.1-S6), and proanthocyanidin biosynthesis  
221 (AtMYB123, Ccr1.0Ag1758.1 / Ccr1.0Ag1766.1 / Ccr1.0Ag1768.1 / Ccr1.0Ag1770.1 / Ccr1.0Ag1773.1 /  
222 Ccr1.0Ag5531.1 / Ccr1.0Ag5542.1 / Ccr1.0Ag5543.1 / Ccr1.0Eg0443.1 / Ccr1.0Eg0444.1 / Ccr1.0Gg0097.1  
223 / Ccr1.0Gg0098.1 / Ccr1.0Hg2677.1 / Ccr1.0Jg0953.1 / Ccr1.0Jg2532.1 / Ccr1.0Lg0385.1 /  
224 Ccr1.0Lg3370.1) were detected. In general, copy number differences can be explained by lineage-  
225 specific duplication events. Therefore, it is not possible to establish 1:1 relationships between A.



226 *thaliana* and *C. crenata*. Interestingly, there are multiple homologs of AtMYB123 in *C. crenata* which  
227 could indicate a high importance of proanthocyanidins in this species. Further investigations could  
228 analyze the transcription of these genes to exclude unexpressed copies. The reduced number of PAP  
229 homologs could suggest a lower importance of anthocyanins. While the copies of the anthocyanin  
230 regulator show different functions in *A. thaliana* [66], loss of MYB114 in several *A. thaliana* accessions  
231 including Col-0 [67] and Nd-1 [68] suggest that there is functional redundancy between them.

232

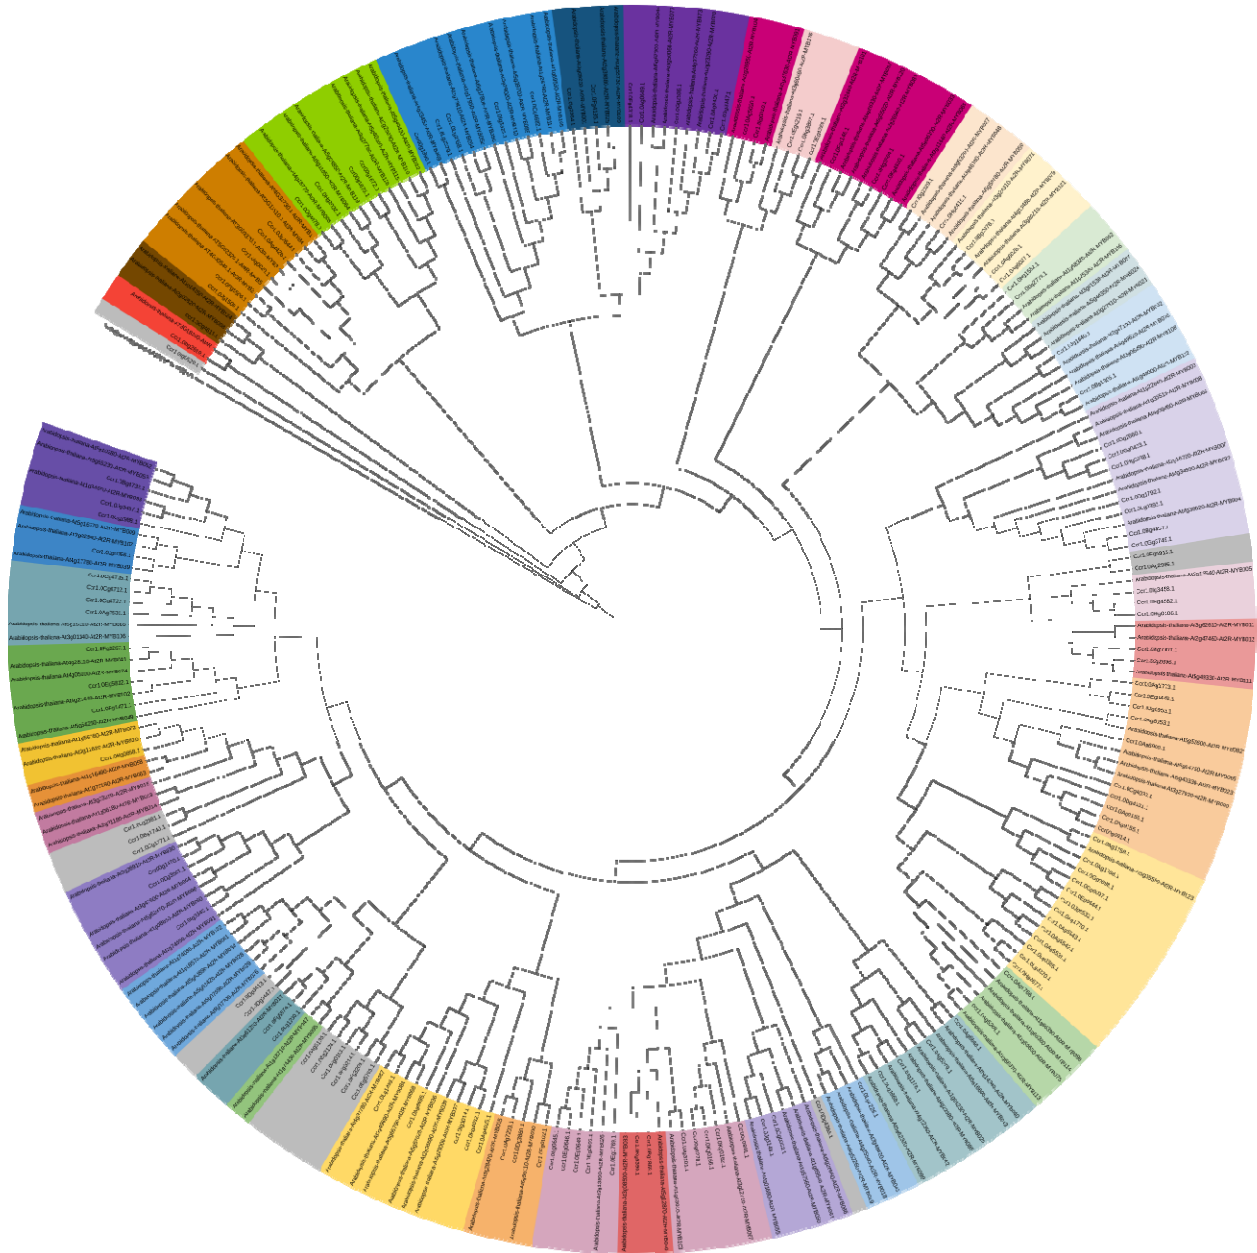

233

234 **Fig. 3:** Relationships of *Castanea crenata* MYB candidates and well characterized *Arabidopsis thaliana*  
235 MYBs. This figure was constructed with iTOL [69].

236

### 237 **Discovery of MYBs in the *Croton tiglium* transcriptome assembly**

238 To demonstrate that the pipeline also works for inherently incomplete transcriptome assemblies, MYBs  
239 were investigated in the transcriptome assembly of *Croton tiglium* [70]. An analysis with default  
240 parameters revealed 140 MYBs (**Fig. 4**, Additional file 5). This includes 103 candidates with a complete  
241 R2R3-MYB domain. Transcriptome assemblies are known to be rich in isoforms of the same genes, which  
242 can be due to alternative splicing or artifacts. Clusters of these isoforms were represented by the  
243 longest sequence among them. This reduced the number of MYB candidates to 79 including 69 with a  
244 R2R3 domain. Not all *A. thaliana* MYBs are matched by orthologs in *C. tiglium*. Although this  
245 transcriptome assembly is based on paired-end RNA-seq data sets representing leaf, root, stem, seed,  
246 and inflorescence, some not or lowly expressed MYBs might not be represented in the assembly.  
247 Therefore, they cannot be identified in this analysis. Again, the absence of orthologs of the glucosinolate  
248 regulating MYBs aligns well with previous reports [3], because *C. tiglium* belongs to the Euphorbiaceae.  
249 The conserved regulators of the flavonoid biosynthesis (AtMYB011/AtMYB012/AtMYB111, TRINITY-  
250 DN21046-c0-g1-i2-S7) and proanthocyanidin biosynthesis (AtMYB123, TRINITY-DN31260-c4-g2-i2-S5)  
251 were detected. These findings are in line with previous reports of the flavonol regulators and  
252 proanthocyanidin regulator being detectable in this transcriptome assembly [71]. The absence of a PAP  
253 ortholog from the assembly is not surprising, because none of the sampled tissues showed a  
254 pigmentation by anthocyanins [70]. Anthocyanin regulators are well known to be lowly expressed in  
255 tissues without anthocyanin pigmentation [72, 73] thus a lack of expression is a likely explanation of this  
256 result.

257

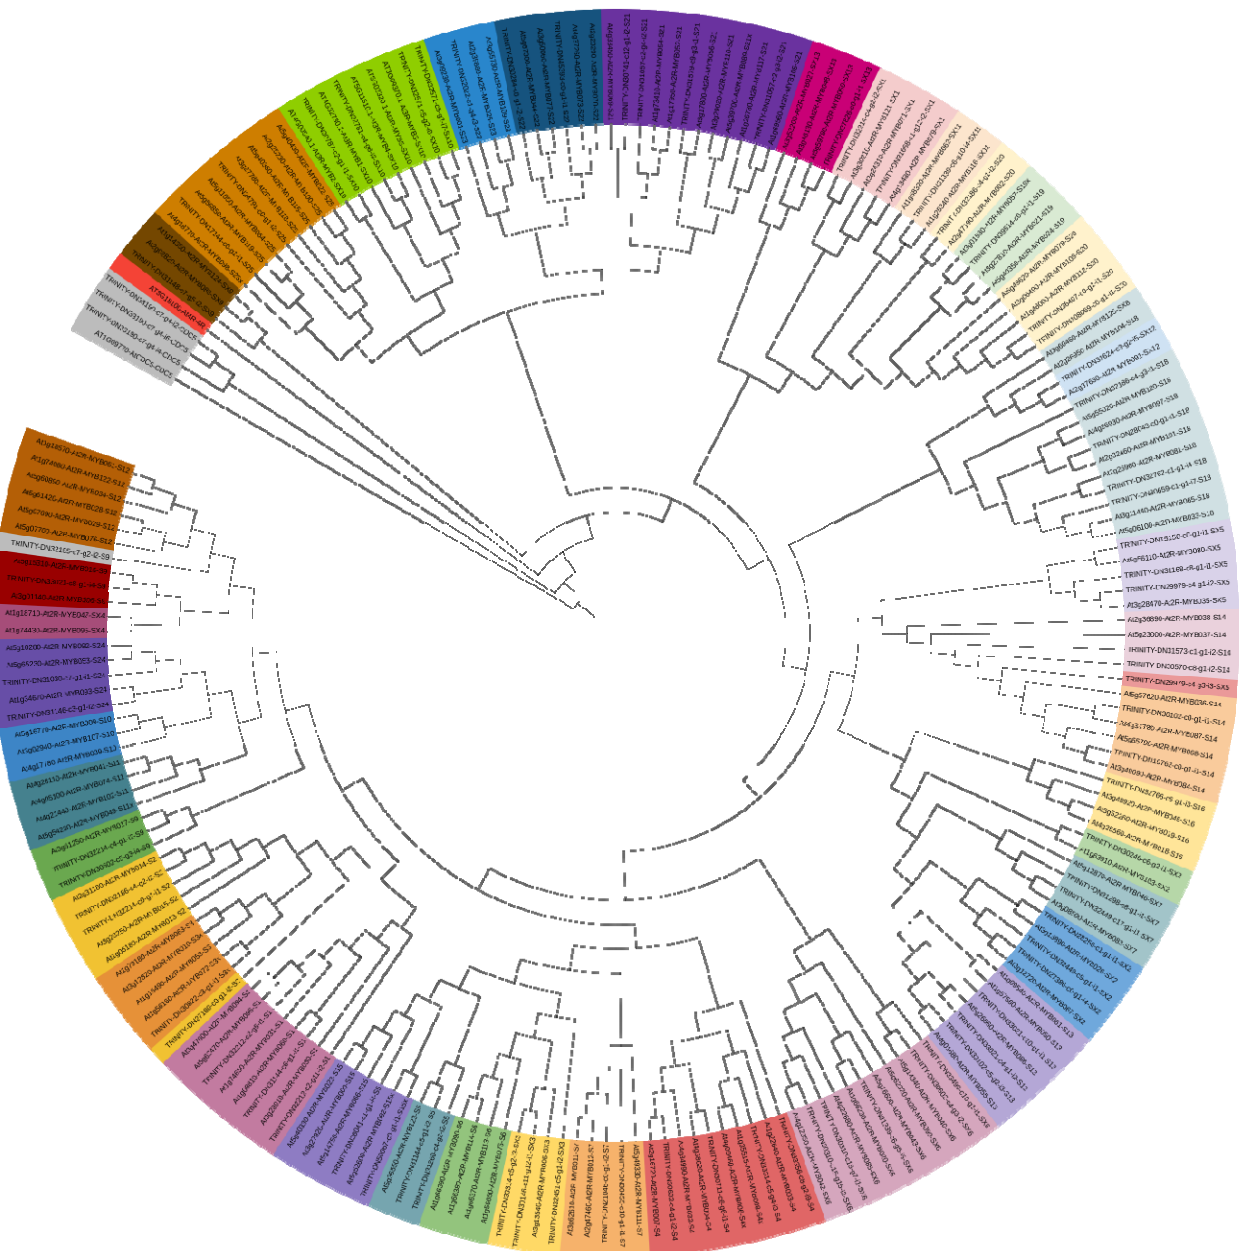

258

259 **Fig. 4:** Relationships of *Croton tigrium* and well characterized *Arabidopsis thaliana* MYBs. This figure was  
260 constructed with iTOL [69].

261

## 262 Limitations and next steps

263 The collection of bait sequences distributed with the tool should be appropriate for most applications.  
264 This collection covers a large taxonomic range including chlorophytes, charophycean algae, bryophytes,  
265 and vascular plants. The dominance of sequences belonging to vascular plants can be explained by the  
266 generally larger MYB families in these species. The major MYB lineages are represented in this

267 collection, but MYB lineages that are restricted to certain taxonomic groups could be missing. While the  
268 initial identification based on overall sequence similarity is a robust approach, the precise classification  
269 and functional annotation of such MYBs could be less accurate due to the lack of close orthologs. The  
270 only critical step is the separation between MYBs and MYB-like sequences. Emerging and species-  
271 specific MYB clades embedded in widely distributed clades are not a major concern, because it is  
272 possible to adjust the parameters of the analysis when analyzing isolated species e.g. members of the  
273 Lycophytes or Magnoliidae (see documentation for technical details). Only sequences at the basis of the  
274 MYB gene family tree could be at risk of being missed.

275 There are constraints that influence the size of the bait sequence collection. A narrower set of bait  
276 sequences could reduce the run time if a comprehensive investigation of numerous genome sequences  
277 of one taxonomic group is planned. An analysis with a more comprehensive set of MYB sequences could  
278 improve the quality of the results, but would also substantially increase the run time of the analysis. The  
279 generation of an ideal bait sequence set which represents the complete phylogenetic diversity of MYBs  
280 with a minimal number of sequences is a task for future studies.

281 Most steps are deterministic, but minor variations might occur as part of the tree building. However, no  
282 biologically relevant differences were observed during the analyses of 121 benchmarking datasets.  
283 Additionally, the results of analyses with BLAST-based selection of candidates were consistent with the  
284 results of corresponding analyses using HMMER for the identification of initial candidates.

285

## 286 **Conclusions**

287 This approach only relies on standard tools which should be installed on most systems and are also easy  
288 to install if not available already. Technical checks on *A. thaliana* datasets indicate that the pipeline is  
289 accurately identifying MYBs. The performance allows the investigation of one species within minutes on  
290 ubiquitously available hardware. An investigation of the MYB gene families in *Castanea crenata* and  
291 *Croton tiglium* revealed expected patterns and demonstrated the potential to analyze transcriptome  
292 and genome sequence assemblies. While this approach is dedicated to the analysis of MYBs, it could be  
293 adjusted to investigate other transcription factor gene families.

294

295

## 296 **Availability and requirements**

297 **Project name:** MYB\_annotator

298 **Project home page:** [https://github.com/bpucker/MYB\\_annotator](https://github.com/bpucker/MYB_annotator)

299 **Operating system(s):** Linux

300 **Programming language:** Python3

301 **Other requirements:** dendropy, BLAST, HMMER, MAFFT, RAxML or FastTree2

302 **License:** GNU General Public License v3.0

303 **Any restrictions to use by non-academics:** none

304

## 305 **Declarations**

306 **Ethics approval and consent to participate**

307 Not applicable

308

309 **Consent for publication**

310 Not applicable

311

312 **Availability of data and materials**

313 The pipeline and the required input data sets are freely available via github:  
314 [https://github.com/bpucker/MYB\\_annotator](https://github.com/bpucker/MYB_annotator). Additionally, the released version was archived via zenodo  
315 (10.5281/zenodo.6174039). The analyzed transcriptomic and genomic resources are publicly available:  
316 *Castanea crenata* (BPMU01000001-BPMU01000781) and *Croton tiglium* (PRJNA416498).

317

318 **Competing interests**

319 The authors declare that they have no competing interests.

320

321 **Funding**

322 We acknowledge support by the Open Access Publication Funds of Technische Universität  
323 Braunschweig.

324

325 **Authors' contributions**

326 BP planned the study, wrote the software, performed the bioinformatic analysis, interpreted the results,  
327 and wrote the manuscript.

328

329 **Acknowledgements**

330 Many thanks to the German network for bioinformatics infrastructure (de.NBI, grant 031A533A) and the  
331 Bioinformatics Resource Facility (BRF) at the Center for Biotechnology (CeBiTec) at Bielefeld University  
332 for providing an environment to perform the computational analyses. I am also grateful to Hanna Marie  
333 Schilbert for testing some earlier versions, providing feedback, and requesting additional features.  
334 bioRender.com was used to construct some of the figures.

335

## 336 **References**

- 337 1. Klempnauer KH, Gonda TJ, Bishop JM. Nucleotide sequence of the retroviral leukemia gene v-myb and  
338 its cellular progenitor c-myb: the architecture of a transduced oncogene. *Cell*. 1982;31 2 Pt 1:453–63.
- 339 2. Stracke R, Werber M, Weisshaar B. The R2R3-MYB gene family in *Arabidopsis thaliana*. *Current*  
340 *Opinion in Plant Biology*. 2001;4:447–56.
- 341 3. Matus JT, Aquea F, Arce-Johnson P. Analysis of the grape MYB R2R3 subfamily reveals expanded wine  
342 quality-related clades and conserved gene structure organization across *Vitis* and *Arabidopsis* genomes.  
343 *BMC Plant Biology*. 2008;8:83.
- 344 4. Pucker B, Pandey A, Weisshaar B, Stracke R. The R2R3-MYB gene family in banana (*Musa acuminata*):  
345 Genome-wide identification, classification and expression patterns. *PLOS ONE*. 2020;15:e0239275.
- 346 5. Jiang C-K, Rao G-Y. Insights into the Diversification and Evolution of R2R3-MYB Transcription Factors in  
347 Plants. *Plant Physiology*. 2020;183:637–55.
- 348 6. Yuan Y, Yang X, Feng M, Ding H, Khan MT, Zhang J, et al. Genome-wide analysis of R2R3-MYB  
349 transcription factors family in the autopolyploid *Saccharum spontaneum*: an exploration of dominance  
350 expression and stress response. *BMC Genomics*. 2021;22:622.
- 351 7. Dubos C, Stracke R, Grotewold E, Weisshaar B, Martin C, Lepiniec L. MYB transcription factors in  
352 *Arabidopsis*. *Trends in Plant Science*. 2010;15:573–81.
- 353 8. Ogata K, Kanei-Ishii C, Sasaki M, Hatanaka H, Nagadoi A, Enari M, et al. The cavity in the hydrophobic  
354 core of Myb DNA-binding domain is reserved for DNA recognition and trans-activation. *Nat Struct Mol*  
355 *Biol*. 1996;3:178–87.
- 356 9. Jia L, Clegg MT, Jiang T. Evolutionary dynamics of the DNA-binding domains in putative R2R3-MYB  
357 genes identified from rice subspecies indica and japonica genomes. *Plant Physiol*. 2004;134:575–85.
- 358 10. Du H, Liang Z, Zhao S, Nan M-G, Tran L-SP, Lu K, et al. The Evolutionary History of R2R3-MYB Proteins  
359 Across 50 Eukaryotes: New Insights Into Subfamily Classification and Expansion. *Sci Rep*. 2015;5:11037.
- 360 11. Ito M. Conservation and diversification of three-repeat Myb transcription factors in plants. *J Plant*  
361 *Res*. 2005;118:61–9.

- 362 12. Haga N, Kato K, Murase M, Araki S, Kubo M, Demura T, et al. R1R2R3-Myb proteins positively  
363 regulate cytokinesis through activation of KNOLLE transcription in *Arabidopsis thaliana*. *Development*.  
364 2007;134:1101–10.
- 365 13. Rosinski JA, Atchley WR. Molecular evolution of the Myb family of transcription factors: evidence for  
366 polyphyletic origin. *J Mol Evol*. 1998;46:74–83.
- 367 14. Braun EL, Grotewold E. Newly discovered plant c-myb-like genes rewrite the evolution of the plant  
368 myb gene family. *Plant Physiol*. 1999;121:21–4.
- 369 15. Kranz H, Scholz K, Weisshaar B. c-MYB oncogene-like genes encoding three MYB repeats occur in all  
370 major plant lineages. *Plant J*. 2000;21:231–5.
- 371 16. Jiang C, Gu J, Chopra S, Gu X, Peterson T. Ordered origin of the typical two- and three-repeat Myb  
372 genes. *Gene*. 2004;326:13–22.
- 373 17. Lee MM, Schiefelbein J. WEREWOLF, a MYB-Related Protein in *Arabidopsis*, Is a Position-Dependent  
374 Regulator of Epidermal Cell Patterning. *Cell*. 1999;99:473–83.
- 375 18. Stracke R, Ishihara H, Hup G, Barsch A, Mehrtens F, Niehaus K, et al. Differential regulation of  
376 closely related R2R3-MYB transcription factors controls flavonol accumulation in different parts of the  
377 *Arabidopsis thaliana* seedling. *Plant J*. 2007;50:660–77.
- 378 19. Naik J, Rajput R, Pucker B, Stracke R, Pandey A. The R2R3-MYB transcription factor MtMYB134  
379 orchestrates flavonol biosynthesis in *Medicago truncatula*. *Plant Mol Biol*. 2021;106:157–72.
- 380 20. Wang B, Luo Q, Li Y, Yin L, Zhou N, Li X, et al. Structural insights into target DNA recognition by R2R3-  
381 MYB transcription factors. *Nucleic Acids Research*. 2020;48:460–71.
- 382 21. Harkess A, Huang K, van der Hulst R, Tissen B, Caplan JL, Koppula A, et al. Sex Determination by Two  
383 Y-Linked Genes in Garden Asparagus. *The Plant Cell*. 2020;32:1790–6.
- 384 22. Stracke R, Holtgräwe D, Schneider J, Pucker B, Rosleff Sørensen T, Weisshaar B. Genome-wide  
385 identification and characterisation of R2R3-MYB genes in sugar beet (*Beta vulgaris*). *BMC Plant Biology*.  
386 2014;14:249.
- 387 23. Zhang X, He Y, Li L, Liu H, Hong G. Involvement of the R2R3-MYB transcription factor MYB21 and its  
388 homologs in regulating flavonol accumulation in *Arabidopsis* stamen. *Journal of Experimental Botany*.  
389 2021;72:4319–32.
- 390 24. Walker AR, Davison PA, Bolognesi-Winfield AC, James CM, Srinivasan N, Blundell TL, et al. The  
391 *TRANSPARENT TESTA GLABRA1* locus, which regulates trichome differentiation and anthocyanin  
392 biosynthesis in *Arabidopsis*, encodes a WD40 repeat protein. *Plant Cell*. 1999;11:1337–50.
- 393 25. Nesi N, Debeaujon I, Jond C, Pelletier G, Caboche M, Lepiniec L. The TT8 Gene Encodes a Basic Helix-  
394 Loop-Helix Domain Protein Required for Expression of *DFR* and *BAN* Genes in *Arabidopsis* Siliques. *Plant*  
395 *Cell*. 2000;12:1863–78.

- 396 26. Ramsay NA, Glover BJ. MYB-bHLH-WD40 protein complex and the evolution of cellular diversity.  
397 Trends Plant Sci. 2005;10:63–70.
- 398 27. Lloyd A, Brockman A, Aguirre L, Campbell A, Bean A, Cantero A, et al. Advances in the MYB–bHLH–  
399 WD Repeat (MBW) Pigment Regulatory Model: Addition of a WRKY Factor and Co-option of an  
400 Anthocyanin MYB for Betalain Regulation. Plant and Cell Physiology. 2017;58:1431–41.
- 401 28. Baudry A, Heim MA, Dubreucq B, Caboche M, Weisshaar B, Lepiniec L. TT2, TT8, and TTG1  
402 synergistically specify the expression of *BANYULS* and proanthocyanidin biosynthesis in *Arabidopsis*  
403 *thaliana*. Plant J. 2004;39:366–80.
- 404 29. Nesi N, Jond C, Debeaujon I, Caboche M, Lepiniec L. The *Arabidopsis* TT2 Gene Encodes an R2R3 MYB  
405 Domain Protein That Acts as a Key Determinant for Proanthocyanidin Accumulation in Developing Seed.  
406 Plant Cell. 2001;13:2099–114.
- 407 30. Jin W, Wang H, Li M, Wang J, Yang Y, Zhang X, et al. The R2R3 MYB transcription factor PavMYB10.1  
408 involves in anthocyanin biosynthesis and determines fruit skin colour in sweet cherry (*Prunus avium* L.).  
409 Plant Biotechnology Journal. 2016;14:2120–33.
- 410 31. Wang H, Zhang H, Yang Y, Li M, Zhang Y, Liu J, et al. The control of red colour by a family of MYB  
411 transcription factors in octoploid strawberry (*Fragaria × ananassa*) fruits. Plant Biotechnology Journal.  
412 2020;18:1169–84.
- 413 32. Zheng X, Om K, Stanton KA, Thomas D, Cheng PA, Eggert A, et al. The regulatory network for petal  
414 anthocyanin pigmentation is shaped by the MYB5a/NEGAN transcription factor in *Mimulus*. Genetics.  
415 2021;217.
- 416 33. Tan Z, Xie Z, Dai L, Zhang Y, Hu Z, Tang S, et al. Genome- and transcriptome-wide association studies  
417 reveal the genetic basis and the breeding history of seed glucosinolate content in *Brassica napus*. Plant  
418 Biotechnol J. 2021. <https://doi.org/10.1111/pbi.13707>.
- 419 34. Gigolashvili T, Berger B, Mock H-P, Müller C, Weisshaar B, Flügge U-I. The transcription factor  
420 HIG1/MYB51 regulates indolic glucosinolate biosynthesis in *Arabidopsis thaliana*. The Plant Journal.  
421 2007;50:886–901.
- 422 35. Hirai MY, Sugiyama K, Sawada Y, Tohge T, Obayashi T, Suzuki A, et al. Omics-based identification of  
423 *Arabidopsis* Myb transcription factors regulating aliphatic glucosinolate biosynthesis. PNAS.  
424 2007;104:6478–83.
- 425 36. Frerigmann H, Gigolashvili T. Update on the role of R2R3-MYBs in the regulation of glucosinolates  
426 upon sulfur deficiency. Frontiers in Plant Science. 2014;5:626.
- 427 37. Hatlestad GJ, Akhavan NA, Sunnadeniya RM, Elam L, Cargile S, Hembd A, et al. The beet *Y* locus  
428 encodes an anthocyanin MYB-like protein that activates the betalain red pigment pathway. Nat Genet.  
429 2015;47:92–6.
- 430 38. Stetter MG, Vidal-Villarejo M, Schmid KJ. Parallel Seed Color Adaptation during Multiple  
431 Domestication Attempts of an Ancient New World Grain. Molecular Biology and Evolution.  
432 2020;37:1407–19.



- 433 39. Siadjeu C, Pucker B, Viehöver P, Albach DC, Weisshaar B. High Contiguity de novo Genome Sequence  
434 Assembly of Trifoliolate Yam (*Dioscorea dumetorum*) Using Long Read Sequencing. *Genes*. 2020;11:274.
- 435 40. Siadjeu C, Mayland-Quellhorst E, Pande S, Laubinger S, Albach DC. Transcriptome Sequence Reveals  
436 Candidate Genes Involving in the Post-Harvest Hardening of Trifoliolate Yam *Dioscorea dumetorum*.  
437 *Plants*. 2021;10:787.
- 438 41. Chagné D, Lin-Wang K, Espley RV, Volz RK, How NM, Rouse S, et al. An Ancient Duplication of Apple  
439 MYB Transcription Factors Is Responsible for Novel Red Fruit-Flesh Phenotypes. *Plant Physiol*.  
440 2013;161:225–39.
- 441 42. Xi W, Feng J, Liu Y, Zhang S, Zhao G. The R2R3-MYB transcription factor PaMYB10 is involved in  
442 anthocyanin biosynthesis in apricots and determines red blushed skin. *BMC Plant Biology*. 2019;19:287.
- 443 43. Mikhaylova EV, Shein MY, Artyukhin AY, Sukhareva AS, Panfilova MA, Kuluev BR. Editing of the MYB  
444 genes in *Brassica napus* as a method to increase anthocyanin pigmentation and stress tolerance. *E3S*  
445 *Web Conf*. 2020;224:04022.
- 446 44. Khusnutdinov E, Sukhareva A, Panfilova M, Mikhaylova E. Anthocyanin Biosynthesis Genes as Model  
447 Genes for Genome Editing in Plants. *International Journal of Molecular Sciences*. 2021;22:8752.
- 448 45. Yanhui C, Xiaoyuan Y, Kun H, Meihua L, Jigang L, Zhaofeng G, et al. The MYB Transcription Factor  
449 Superfamily of *Arabidopsis*: Expression Analysis and Phylogenetic Comparison with the Rice MYB Family.  
450 *Plant Mol Biol*. 2006;60:107–24.
- 451 46. Wilkins O, Nahal H, Foong J, Provart NJ, Campbell MM. Expansion and Diversification of the *Populus*  
452 R2R3-MYB Family of Transcription Factors. *Plant Physiology*. 2009;149:981–93.
- 453 47. Du H, Feng B-R, Yang S-S, Huang Y-B, Tang Y-X. The R2R3-MYB Transcription Factor Gene Family in  
454 Maize. *PLOS ONE*. 2012;7:e37463.
- 455 48. Cao Y, Jia H, Xing M, Jin R, Grierson D, Gao Z, et al. Genome-Wide Analysis of MYB Gene Family in  
456 Chinese Bayberry (*Morella rubra*) and Identification of Members Regulating Flavonoid Biosynthesis.  
457 *Frontiers in Plant Science*. 2021;12:1244.
- 458 49. Li Z, Peng R, Tian Y, Han H, Xu J, Yao Q. Genome-Wide Identification and Analysis of the MYB  
459 Transcription Factor Superfamily in *Solanum lycopersicum*. *Plant and Cell Physiology*. 2016;57:1657–77.
- 460 50. Yang Y, Moore MJ, Brockington SF, Soltis DE, Wong GK-S, Carpenter EJ, et al. Dissecting Molecular  
461 Evolution in the Highly Diverse Plant Clade Caryophyllales Using Transcriptome Sequencing. *Mol Biol*  
462 *Evol*. 2015;32:2001–14.
- 463 51. Emms DM, Kelly S. OrthoFinder: phylogenetic orthology inference for comparative genomics.  
464 *Genome Biology*. 2019;20:238.
- 465 52. Zhang R, Kuo R, Coulter M, Calixto CPG, Entizne JC, Guo W, et al. A high resolution single molecule  
466 sequencing-based *Arabidopsis* transcriptome using novel methods of Iso-seq analysis. 2021.

- 467 53. Guang A, Howison M, Zapata F, Lawrence C, Dunn CW. Revising transcriptome assemblies with  
468 phylogenetic information. PLOS ONE. 2021;16:e0244202.
- 469 54. Cheng C-Y, Krishnakumar V, Chan AP, Thibaud-Nissen F, Schobel S, Town CD. Araport11: a complete  
470 reannotation of the *Arabidopsis thaliana* reference genome. The Plant Journal. 2017;89:789–804.
- 471 55. Altschul SF, Gish W, Miller W, Myers EW, Lipman DJ. Basic local alignment search tool. J Mol Biol.  
472 1990;215:403–10.
- 473 56. Altschul SF, Madden TL, Schäffer AA, Zhang J, Zhang Z, Miller W, et al. Gapped BLAST and PSI-BLAST:  
474 a new generation of protein database search programs. Nucleic Acids Res. 1997;25:3389–402.
- 475 57. Mistry J, Finn RD, Eddy SR, Bateman A, Punta M. Challenges in homology search: HMMER3 and  
476 convergent evolution of coiled-coil regions. Nucleic Acids Res. 2013;41:e121.
- 477 58. Katoh K, Standley DM. MAFFT Multiple Sequence Alignment Software Version 7: Improvements in  
478 Performance and Usability. Mol Biol Evol. 2013;30:772–80.
- 479 59. Kozlov AM, Darriba D, Flouri T, Morel B, Stamatakis A. RAxML-NG: a fast, scalable and user-friendly  
480 tool for maximum likelihood phylogenetic inference. Bioinformatics. 2019;35:4453–5.
- 481 60. Price MN, Dehal PS, Arkin AP. FastTree 2 – Approximately Maximum-Likelihood Trees for Large  
482 Alignments. PLOS ONE. 2010;5:e9490.
- 483 61. Sukumaran J, Holder MT. DendroPy: a Python library for phylogenetic computing. Bioinformatics.  
484 2010;26:1569–71.
- 485 62. Feng G, Burleigh JG, Braun EL, Mei W, Barbazuk WB. Evolution of the 3R-MYB Gene Family in Plants.  
486 Genome Biology and Evolution. 2017;9:1013–29.
- 487 63. Pucker B, Holtgräwe D, Stadermann KB, Frey K, Huettel B, Reinhardt R, et al. A chromosome-level  
488 sequence assembly reveals the structure of the *Arabidopsis thaliana* Nd-1 genome and its gene set.  
489 PLOS ONE. 2019;14:e0216233.
- 490 64. Goodstein DM, Shu S, Howson R, Neupane R, Hayes RD, Fazo J, et al. Phytozome: a comparative  
491 platform for green plant genomics. Nucleic Acids Res. 2012;40 Database issue:D1178–86.
- 492 65. Shirasawa K, Nishio S, Terakami S, Botta R, Marinoni DT, Isobe S. Chromosome-level genome  
493 assembly of Japanese chestnut (*Castanea crenata* Sieb. et Zucc.) reveals conserved chromosomal  
494 segments in woody rosids. 2021.
- 495 66. Koo Y, Poethig RS. Expression pattern analysis of three R2R3-MYB transcription factors for the  
496 production of anthocyanin in different vegetative stages of *Arabidopsis* leaves. Applied Biological  
497 Chemistry. 2021;64:5.
- 498 67. Gonzalez A, Zhao M, Leavitt JM, Lloyd AM. Regulation of the anthocyanin biosynthetic pathway by  
499 the TTG1/bHLH/Myb transcriptional complex in *Arabidopsis* seedlings. The Plant Journal. 2008;53:814–  
500 27.

- 501 68. Pucker B, Holtgräwe D, Sörensen TR, Stracke R, Viehöver P, Weisshaar B. A De Novo Genome  
502 Sequence Assembly of the *Arabidopsis thaliana* Accession Niederzenz-1 Displays Presence/Absence  
503 Variation and Strong Synteny. PLOS ONE. 2016;11:e0164321.
- 504 69. Letunic I, Bork P. Interactive Tree Of Life (iTOL) v5: an online tool for phylogenetic tree display and  
505 annotation. Nucleic Acids Research. 2021;49:W293–6.
- 506 70. Haak M, Vinke S, Keller W, Droste J, Rückert C, Kalinowski J, et al. High Quality *de Novo*  
507 Transcriptome Assembly of *Croton tiglium*. Front Mol Biosci. 2018;5.
- 508 71. Pucker B, Reiher F, Schilbert HM. Automatic Identification of Players in the Flavonoid Biosynthesis  
509 with Application on the Biomedicinal Plant *Croton tiglium*. Plants. 2020;9:1103.
- 510 72. Takos AM, Jaffé FW, Jacob SR, Bogs J, Robinson SP, Walker AR. Light-Induced Expression of a MYB  
511 Gene Regulates Anthocyanin Biosynthesis in Red Apples. Plant Physiol. 2006;142:1216–32.
- 512 73. Guo N, Han S, Zong M, Wang G, Zheng S, Liu F. Identification and differential expression analysis of  
513 anthocyanin biosynthetic genes in leaf color variants of ornamental kale. BMC Genomics. 2019;20:564.
- 514
- 515
